# Supplementary material for: Placental growth fActor Repeat sampling for Reduction of adverse perinatal Outcomes in women with suspecTed pre-eclampsia: study protocol for a randomised controlled trial (PARROT-2)
Source: Research Square preprint supplement (doi:10.21203/rs.3.rs-1769344/v1), 2022-07-29
Supplement: Supplementary file 1 [file c451210e3cb01559d29e30de.docx]

# Professor Jüni, Professor Li, and Professor Treweek

Editors-in-Chief, Trials

**17th June 2022**

Dear Professor Jüni, Professor Li, Professor Treweek and colleagues,

*Re:* *Placental growth fActor Repeat sampling for Reduction of adverse perinatal Outcomes in women with suspecTed pre-eclampsia: study protocol for a randomised controlled trial (PARROT-2)*

Please find our manuscript attached for consideration of publication in Trials.

The PARROT-2 trial is an individualized randomized controlled trial of repeat revealed placental growth factor-based testing, compared to repeat concealed testing, in women with suspected preterm pre-eclampsia. All women participating in the trial receive an initial revealed placental growth factor-based test as part of usual care and in accordance with national guidance for the management of pre-eclampsia in the United Kingdom. The protocol has been written according to SPIRIT guidelines and a SPIRIT checklist has been submitted with the proposed manuscript. The trial is underway but has not completed recruitment.

As part of a competitive application process for trial funding, the protocol has been peer-reviewed and we are submitting the grant review and response with the manuscript. As the study has previously received full external peer review, we would be grateful if our protocol manuscript could undergo editorial peer review by a protocol editor.

Many thanks for considering our manuscript for publication.

Yours sincerely,


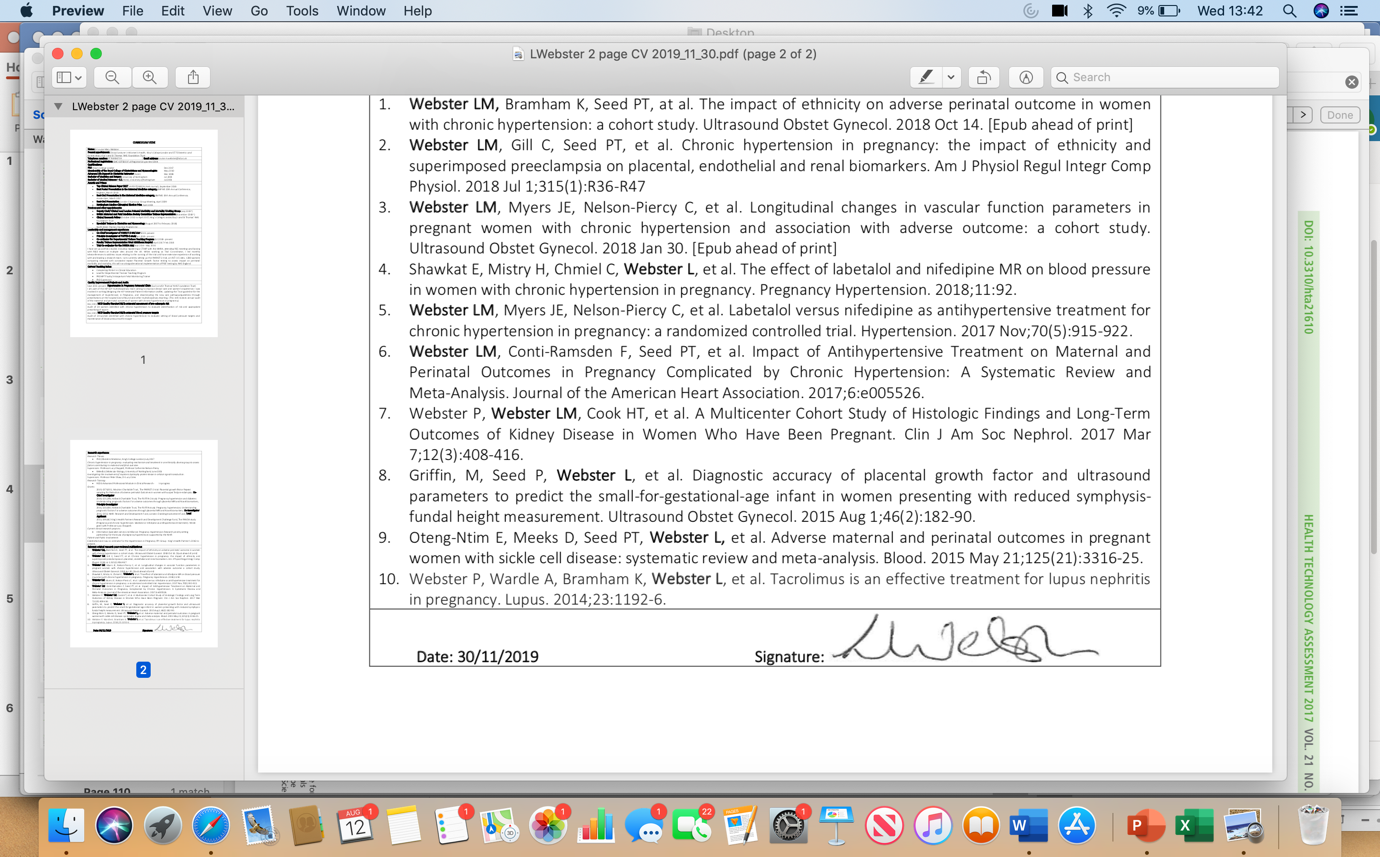


Dr Louise Webster

Consultant Obstetrician and co-Chief Investigator of the PARROT-2 trial
